# Supplementary material for: Reducing N6AMT1-mediated 6mA DNA modification promotes breast tumor progression via transcriptional repressing cell cycle inhibitors
Source: PubMed Central journal article supplement (PMC8901905; doi:10.1038/s41419-022-04661-8), 2022-03-07

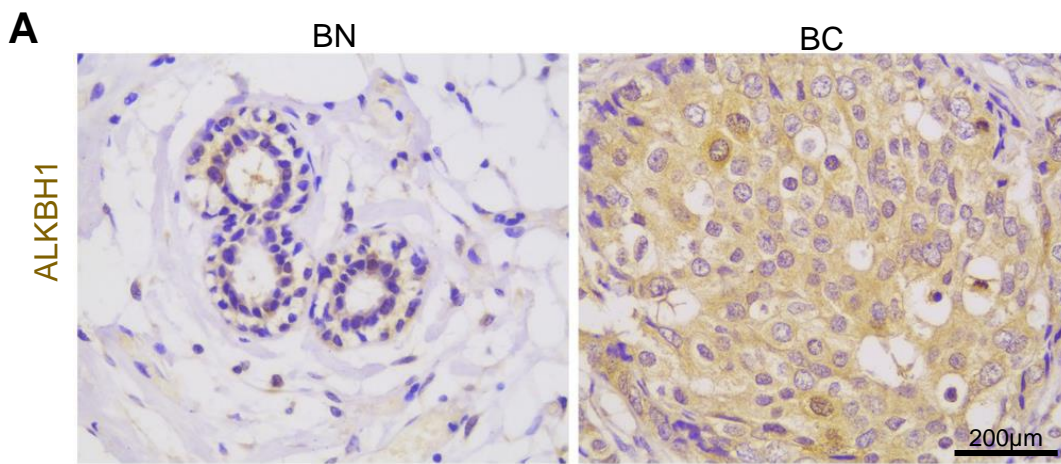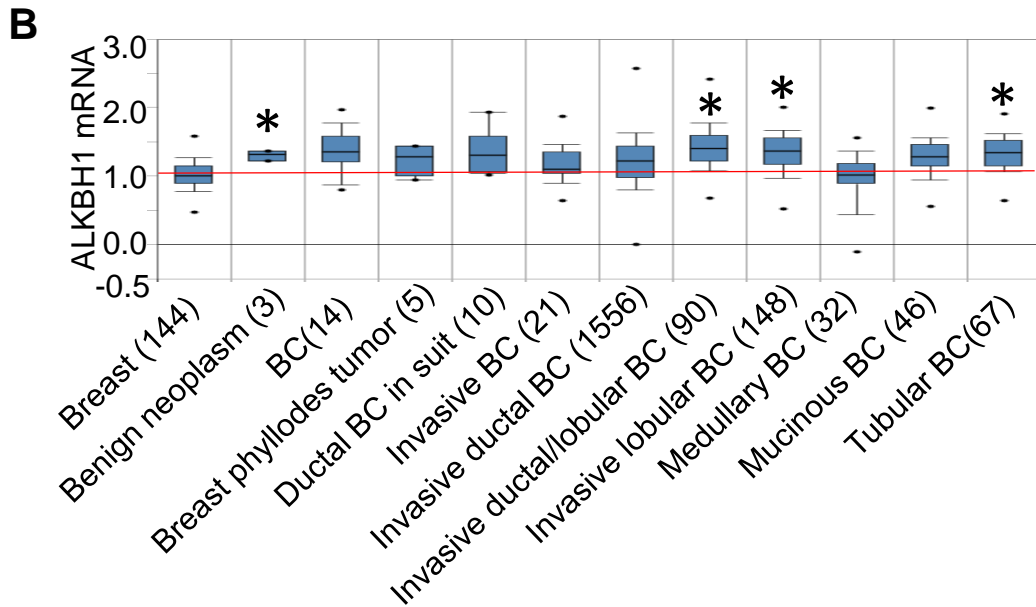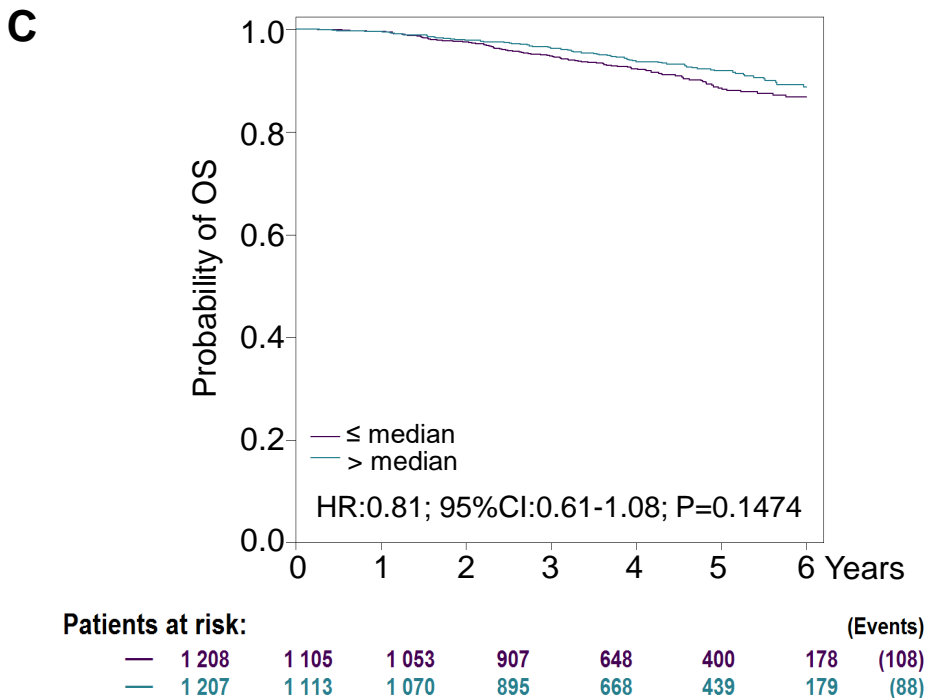

**Figure S1. ALKBH1 was dispensable for the prognosis of BC patients.** a, Representative immunohistochemistry IHC staining of ALKBH1 in breast cancer tissues (BC) and normal breast tissues (BN) samples. b, Box plots shown ALKBH1 mRNA expression in various kinds of BC from the ONCOMINE database analysis of Curtis breasts statistics. c, The prognostic value of ALKBH1 mRNA level in BC patients from the online studies of the BC (bc-GenExMiner v4.0). \*P < 0.05 via normal breast tissues.

**A**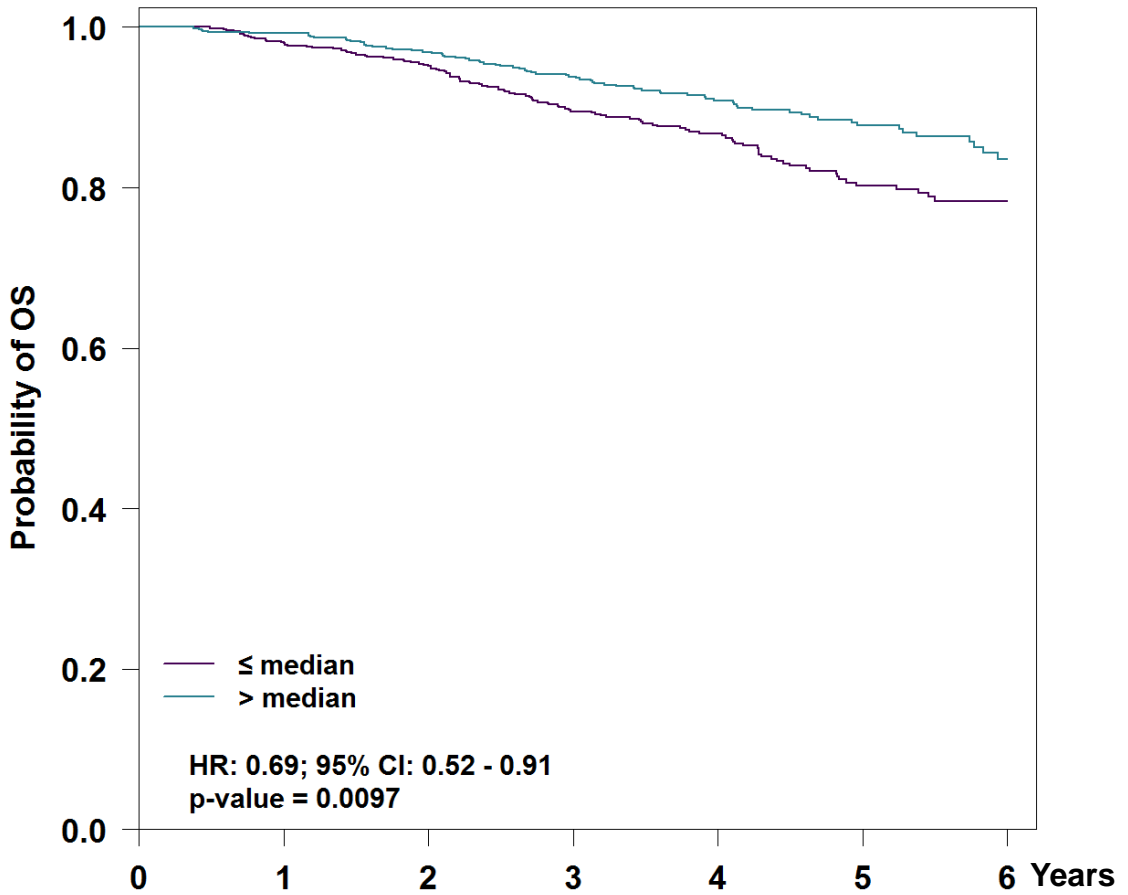**Patients at risk:****(Events)**

|   |     |     |     |     |     |     |     |       |
|---|-----|-----|-----|-----|-----|-----|-----|-------|
| — | 823 | 706 | 663 | 545 | 359 | 207 | 93  | (116) |
| — | 823 | 713 | 661 | 569 | 411 | 237 | 106 | (87)  |

Figure S2. The decreasing of N6AMT1 mRNA level was significantly correlated with worse overall survival (OS) from the online BC (bc-GenExMiner v4.0).

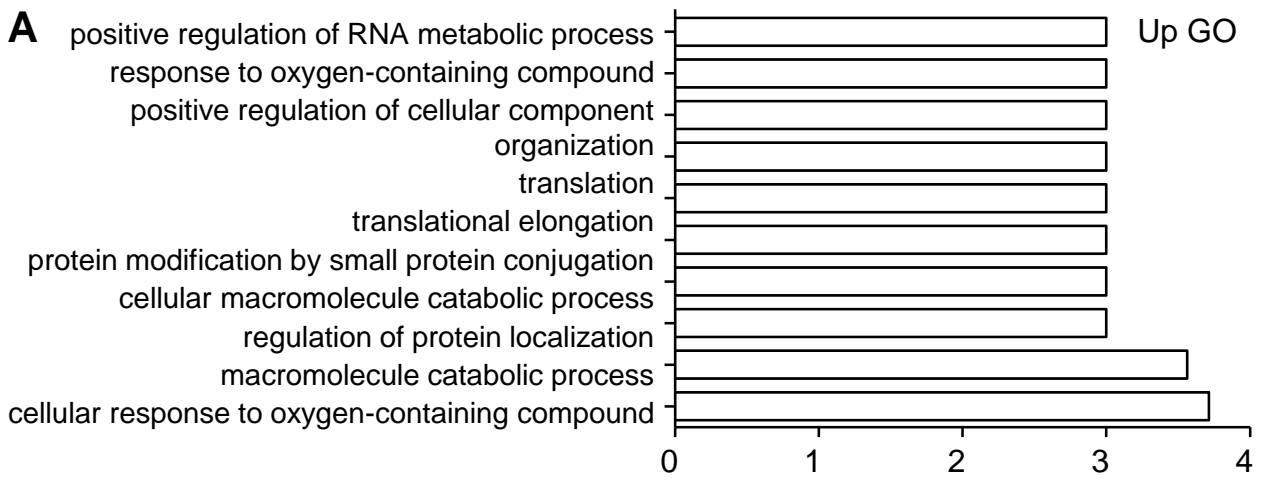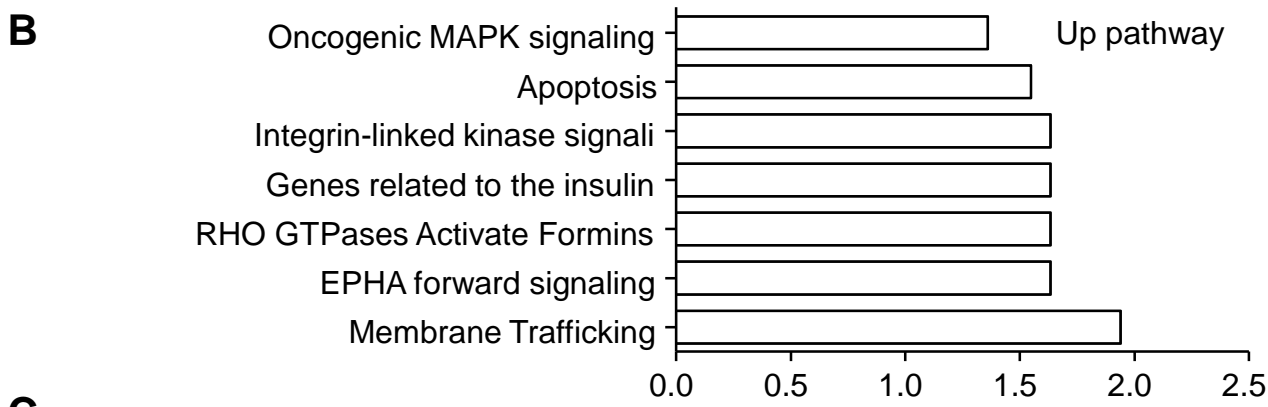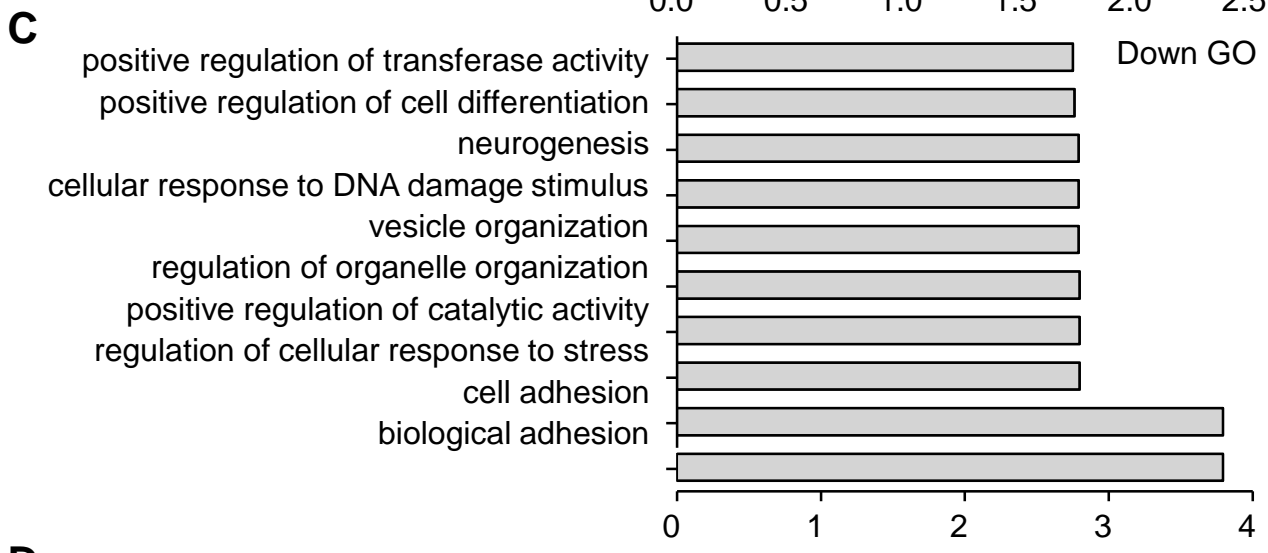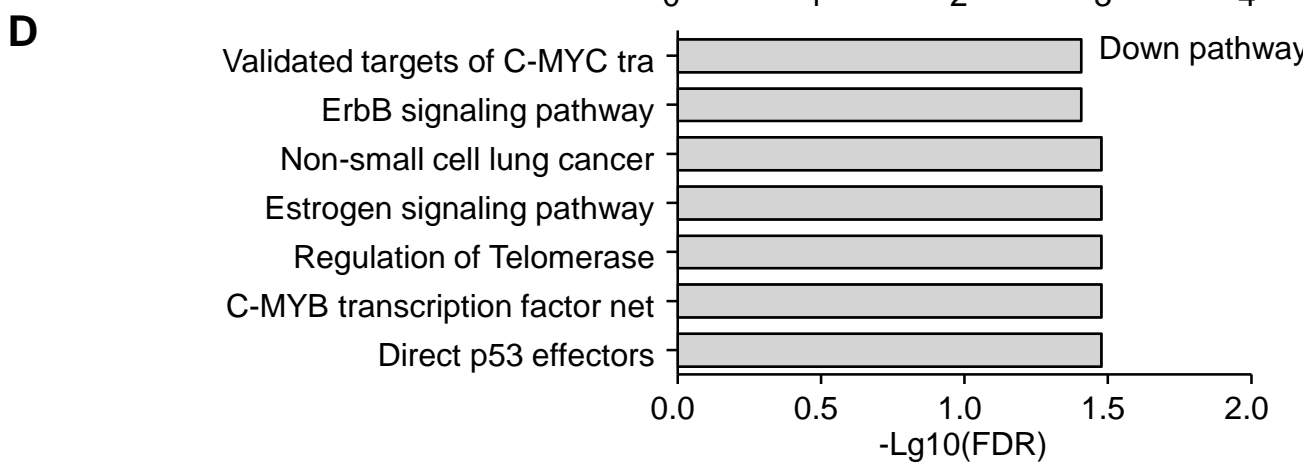

6mA-DIP-seq

RNA seq

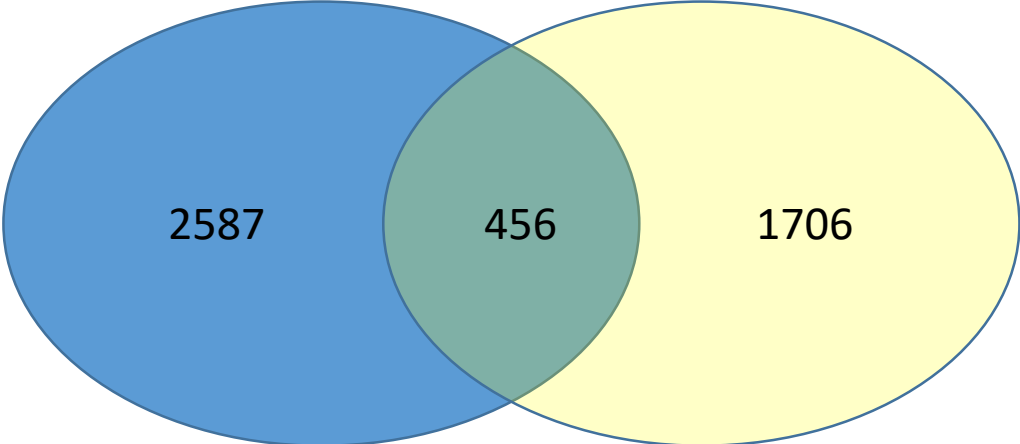

Supplement: 41419_2022_4661_MOESM1_ESM.pdf [file 41419_2022_4661_MOESM1_ESM.pdf]
