# Supplementary material for: Reducing N6AMT1-mediated 6mA DNA modification promotes breast tumor progression via transcriptional repressing cell cycle inhibitors
Source: PubMed Central journal article supplement (PMC8901905; doi:10.1038/s41419-022-04661-8), 2022-03-07

# Uncropped figures for WB

## Figure 2A

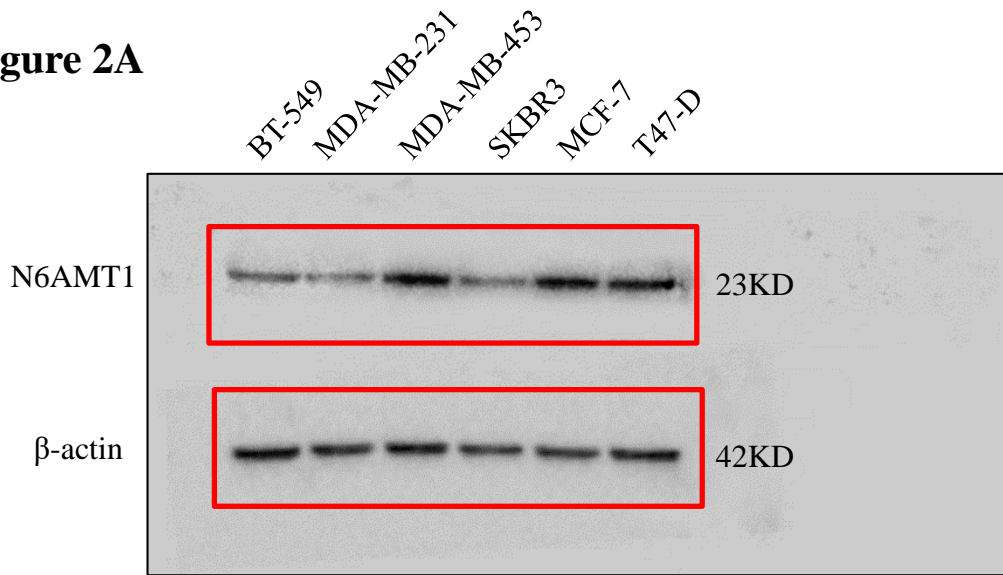

## Figure 2B

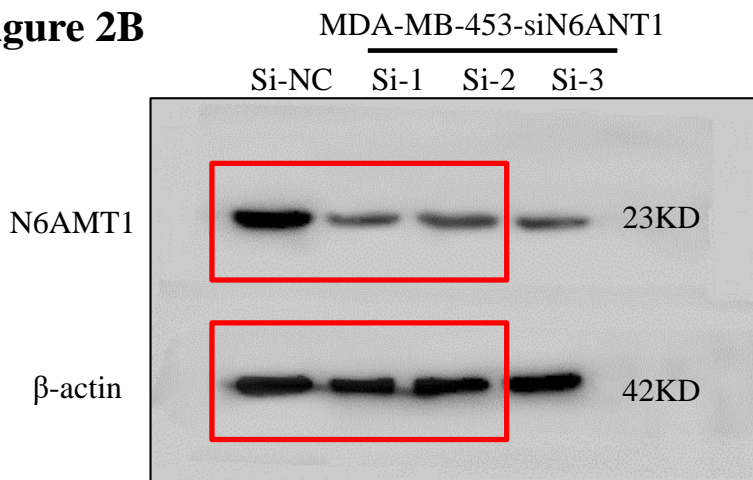

## Figure 2C

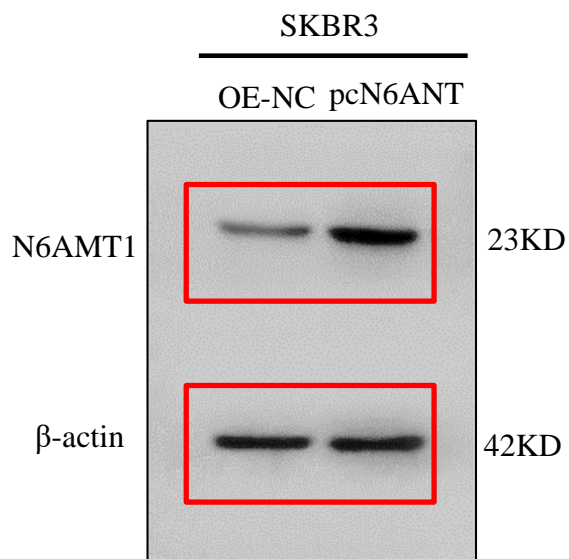

## Figure 3A

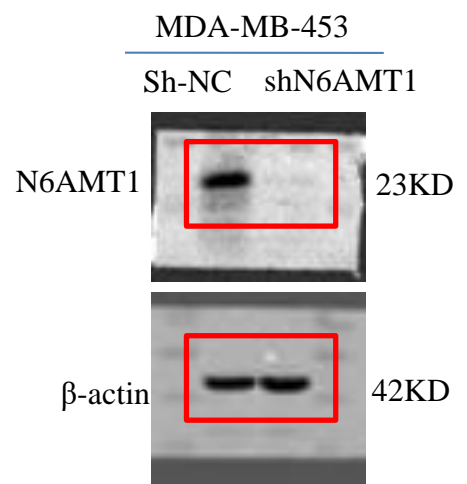

Supplement: 41419_2022_4661_MOESM2_ESM.pdf [file 41419_2022_4661_MOESM2_ESM.pdf]
